2020 | VOLUME 73 | NUMBER 2

The American Journal of  
**Psychotherapy**

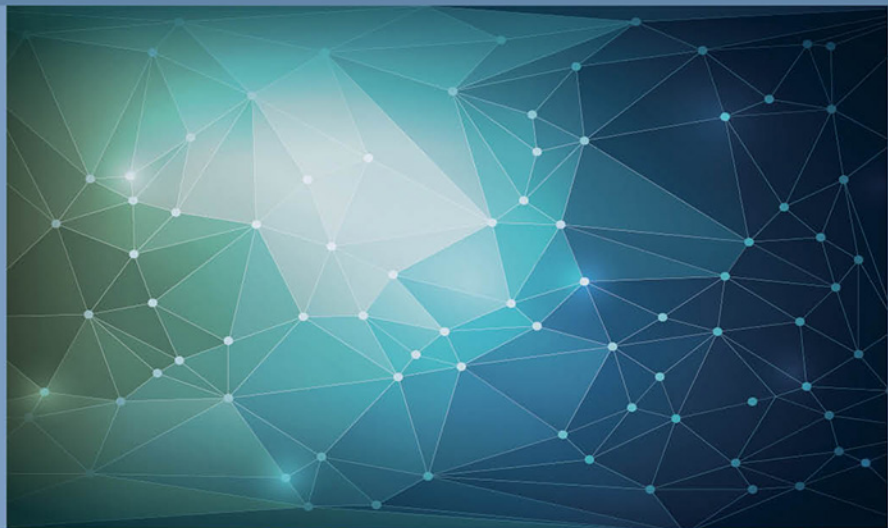

AMERICAN  
**PSYCHIATRIC**  
ASSOCIATION 

[psychotherapy.psychiatryonline.org](http://psychotherapy.psychiatryonline.org)
